# Supplementary material for: Variation by Institution in Sexual Harassment Experiences Among US Medical Interns
Source: PubMed Central journal article supplement (PMC10751587; doi:10.1001/jamanetworkopen.2023.49129), 2023-12-26
Supplement: jamanetwopen-e2349129-s002.pdf [file jamanetwopen-e2349129-s002.pdf]

## Data Sharing Statement

Viglianti. Variation by Institution in Sexual Harassment Experiences Among US Interns. *JAMA Netw Open*. Published December 26, 2023. doi:10.1001/jamanetworkopen.2023.49129

### Data

**Data available:** No

### Additional Information

**Explanation for why data not available:** Data available through ICPSR here:

<https://www.openicpsr.org/openicpsr/project/129225/version/V1/view>
